# Supplementary material
Source: Springer Nature journal article supplement (https://www.springermedizin.de/resource/supplementary/12936_2011_1857_MOESM15_ESM.pdf/9541930)

- Blood
- Liver
- ◆ Spleen
- ▲ Kidney
- ▼ Lung
- Brain

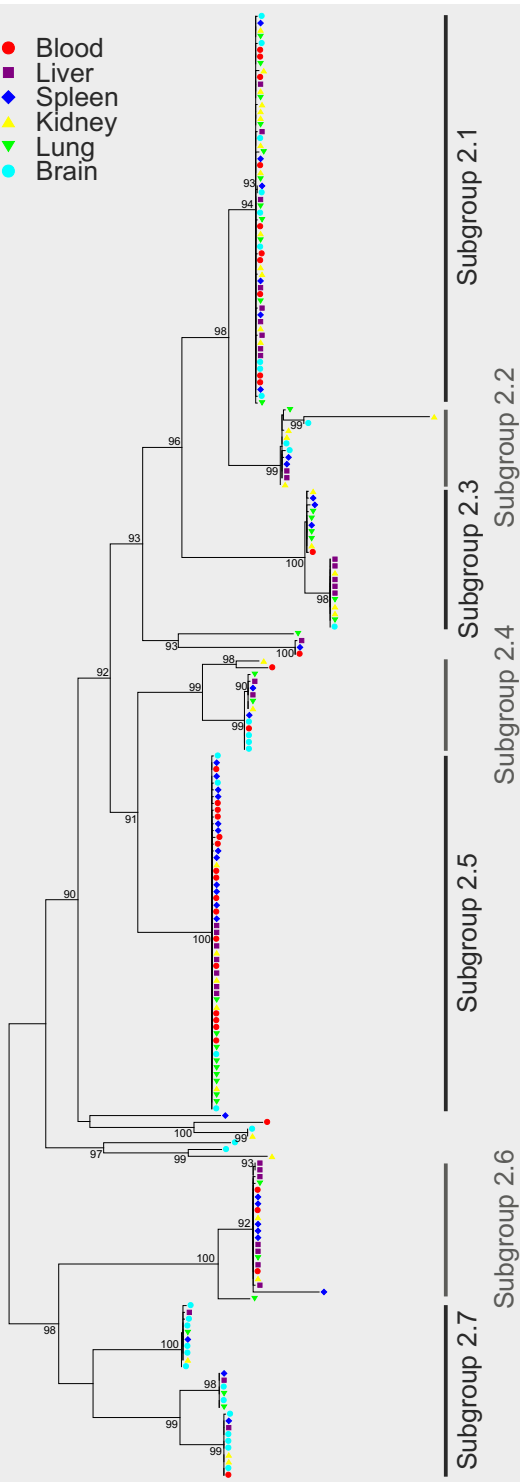

## Frequency of tissues within subgroups

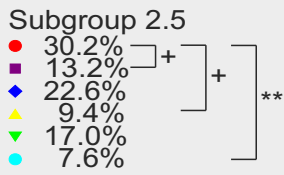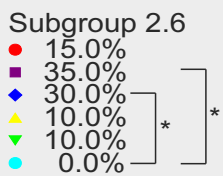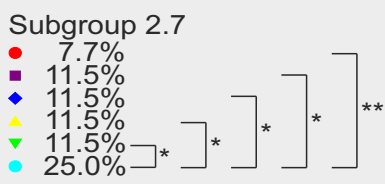

0.1

Supplement: MOESM15 [file 9541930]
